1 **Istradefylline, an adenosine A2a receptor antagonist, ameliorates neutrophilic airway**  
2 **inflammation and psoriasis in mice.**

3

4 **Running title:** Adenosine A2a receptor antagonist ameliorates neutrophilic inflammation

5

6 Mieko Tokano <sup>a,b</sup>, Masaaki Kawano<sup>a</sup>, Rie Takagi<sup>a</sup>, and Sho Matsushita<sup>a,c\*</sup>

7 <sup>a</sup> Departments of Allergy and Immunology, Faculty of Medicine, Saitama Medical University,  
8 38 Morohongo, Moroyama, Saitama 350-0495, Japan

9 <sup>b</sup> Department of Neurology, Saitama Medical University, 38 Morohongo, Moroyama,  
10 Saitama, 350-0495, Japan

11 <sup>c</sup> Allergy Center, Saitama Medical University, 38 Morohongo, Moroyama, Saitama 350-0495,  
12 Japan

13

14 \*Correspondence: Sho Matsushita, M.D., Ph.D.

15 Department of Allergy and Immunology, Faculty of Medicine, Saitama Medical University,  
16 38 Morohongo, Moroyama, Saitama 350-0495, Japan

17 Tel: +81-49-276-1172; Fax: +81-49-294-2274; E-mail: [shomat@saitama-med.ac.jp](mailto:shomat@saitama-med.ac.jp)

18

19 **Abstract**

20 **Objective:** Extracellular adenosine is produced from secreted ATP by cluster of differentiation  
21 (CD)39 and CD73. Both are critical nucleotide metabolizing enzymes of the adenosine  
22 generating pathway and are secreted by neuronal or immune cells. Adenosine plays a role in  
23 energy processes, neurotransmission, and endogenous regulation of inflammatory responses.  
24 Istradefylline is a selective adenosine A2a receptor (A2aR) antagonist used for the treatment  
25 of Parkinson's disease. We have reported that adenosine primes hypersecretion of interleukin  
26 (IL)-17A via A2aR. Istradefylline, as well as an inhibitor of CD39 (ARL67156) and an  
27 inhibitor of CD73 (AMP-CP), suppressed IL-17A production, and the administration of  
28 istradefylline to mice with experimental autoimmune encephalomyelitis (EAE) led to the  
29 marked amelioration of the disease. These previous results suggest that adenosine is an  
30 endogenous modulator of neutrophilic inflammation. We investigated the effect of  
31 istradefylline, ARL67156 and AMP-CP on other mouse models of neutrophilic inflammation.  
32 **Methods:** We tested the effect of istradefylline, ARL67156 and AMP-CP on OVA-induced  
33 neutrophilic airway inflammation or imiquimod (IMQ)-induced psoriasis in mice. These two  
34 model mice received these drugs orally or percutaneously, respectively. The production of  
35 IL-17A in the lung and ear thickness were used as an index of the effects.  
36 **Results:** We show that istradefylline, ARL67156 and AMP-CP suppressed the OVA-induced  
37 IL-17A production in the lung and IMQ-induced psoriasis.  
38 **Conclusion:** These results indicate that adenosine-mediated IL-17A production plays a role  
39 in neutrophilic inflammation models, and moreover, istradefylline, ARL67156, and AMP-CP  
40 are effective in animal models of neutrophilic inflammation. Some clinical relevancies in  
41 COVID-19 are discussed. (248 words)

42

43 **Keywords:** Adenosine A2a receptor, Neutrophilic inflammatory response, Psoriasis, Severe

44 acute respiratory syndrome coronavirus 2, Th17 cells

## 45 **Introduction**

46 Adenosine, a molecular moiety of ATP, ADP, and AMP, is involved in energy processes and is  
47 essential for the phenomena of life. Extracellular adenosine is produced from secreted ATP by  
48 ectonucleotidases, such as ecto-nucleoside triphosphate diphosphohydrolase (E-NTPDase)-1  
49 cluster of differentiation (CD)39, which converts ATP or ADP to ADP or AMP, respectively,  
50 and the 5'-nucleotidase CD73, which dephosphorylates AMP to adenosine. CD39 and CD73  
51 are expressed on the surface of endothelial cells<sup>1,2)</sup> and immune cells<sup>3-5)</sup>. Adenosine binds to  
52 adenosine receptors expressed on the cell surface. There are four subtypes of adenosine  
53 receptors, A1, A2a, A2b, and A3, which belong to a superfamily of membrane proteins called  
54 the G protein-coupled receptor family. A2aR and A2bR signal the Gs protein to trigger cAMP  
55 synthesis. On the other hand, A1R and A3R signal the Gi protein to trigger cAMP  
56 degradation<sup>6)</sup>. A1R, A2bR and A3R are widely expressed in the body. In contrast, A2aR is  
57 expressed at high levels in only a few regions of the body, namely the striatum, olfactory  
58 tubercle, nucleus accumbens, endothelial cells, vascular smooth muscle cells, platelets, and  
59 immune cells<sup>7)</sup>. A1R and A2aR are high-affinity receptors, whereas A2bR and A3R are  
60 low-affinity receptors<sup>8,9)</sup>.

61 The purine nucleoside adenosine also plays a role as a neurotransmitter, primarily  
62 in the striatum, olfactory tubercle and nucleus accumbens<sup>10)</sup>. Istradefylline is a selective  
63 A2aR antagonist used for the treatment of Parkinson's disease<sup>11)</sup>. Furthermore, adenosine is a  
64 potent endogenous regulator of inflammation and immune reactions<sup>6)</sup>. However, the  
65 molecular mechanisms underlying its effects are largely unknown. In previous a study,  
66 adenosine was reported to induce T-helper (Th)17 differentiation by activating A2bR<sup>12)</sup>.

67 Th17 cells are a subset of T-helper cells that differentiate from naïve CD4<sup>+</sup> T cells  
68 in the presence of tumor growth factor (TGF)- $\beta$  and interleukin (IL)-6. These cytokines are  
69 secreted by antigen-presenting cells in response to stimulation via T cell receptor (TCR)

70 antigen<sup>13-15</sup>). IL-17A production by Th17 cells drives neutrophil recruitment and neutrophilic  
71 inflammation<sup>16,17</sup>). The IL-17A-mediated responses are induced in receptor-expressing cells,  
72 such as endothelial cells, epithelial cells, and fibroblasts<sup>18</sup>). Neutrophilic inflammation is  
73 associated with many diseases<sup>19</sup>), including autoimmune diseases<sup>20-23</sup>), neutrophilic airway  
74 inflammation<sup>24,25</sup>), psoriasis<sup>26,27</sup>), severe atopic dermatitis<sup>28</sup>), and multiple sclerosis<sup>29-34</sup>). There  
75 are currently no specific therapies that use low-molecular weight chemicals for neutrophilic  
76 inflammation, nevertheless corticosteroids are a specific therapy for eosinophilic  
77 inflammation. However, recent studies by ourselves and others suggested that dopamine  
78 D1-like receptor antagonists and dopamine D2-like receptor agonists suppress neutrophilic  
79 inflammation by suppressing Th17 differentiation and activation<sup>35-37</sup>). We recently reported  
80 that adenosine is also produced by activated CD4<sup>+</sup> T cells, mainly during T cell-APC  
81 interactions, primes the hypersecretion of IL-17A by CD4<sup>+</sup> T cells, where A2aR plays a role  
82 in the hypersecretion of IL-17A. Istradefylline, an inhibitor of CD39 (ARL67156), and an  
83 inhibitor of CD73 (AMP-CP) suppressed IL-17A production, and the administration of  
84 istradefylline to mice with experimental autoimmune encephalomyelitis led to the marked  
85 amelioration of symptoms<sup>38</sup>). These results suggest that adenosine is an endogenous  
86 modulator of neutrophilic inflammation.

87         In this study, we tested the effect of istradefylline, ARL67156, and AMP-CP on  
88 other models of neutrophilic inflammation, such as OVA-induced neutrophilic airway  
89 inflammation and imiquimod-induced psoriasis. We show that istradefylline, ARL67156 and  
90 AMP-CP are effective in animal models of neutrophilic inflammation.

91 **Materials and methods**

92 *Mice*

93 OVA TCR-transgenic DO11.10 mice were obtained from The Jackson Laboratory  
94 (Bar Harbor, ME). C57BL/6 mice were obtained from Japan SLC (Shizuoka, Japan). Mice  
95 were housed in appropriate animal care facilities at Saitama Medical University and handled  
96 according to the international guidelines for experiments with animals. All experiments were  
97 approved by the Animal Research Committee of Saitama Medical University.

98

99 *Measurement of cytokine concentrations in the lung*

100 Airway inflammation was induced as described previously<sup>36</sup>. Briefly,  
101 eight-week-old female DO11.10 mice received a subcutaneous inguinal injection (100  
102 µg/mouse) of 2 mg/mL OVA (Sigma) in PBS (-) emulsified in complete Freund's adjuvant  
103 (CFA) containing mycobacterium tuberculosis H37Ra (100 µg/mouse; Difco) on day -8.  
104 Mice also received oral PBS (-), an A2aR antagonist (Istradefylline) (6 µg/mouse), an  
105 inhibitor of CD39 (ARL67156, Tocris) (0.5 mg/mouse) or an inhibitor of CD73 inhibitor  
106 (adenosine 5'-( $\alpha$ ,  $\beta$ -methylene) diphosphate (AMP-CP; Tocris) (0.5 mg/mouse) on days -10,  
107 -8, -6, -4, -2, and -1. Mice were challenged with an aerosolized solution of 3% OVA or PBS  
108 (-) for 10 min on day -1. The mice were analyzed on day 0. Lung cells were prepared as  
109 previously described<sup>36</sup>. Briefly, the left lungs were cut out, homogenized, and incubated in  
110 10 mL of DMEM medium containing 10% FCS, 100 U/mL penicillin, 100 µg/mL  
111 streptomycin, 1 mM sodium pyruvate, 50 µM 2-mercaptoethanol, 50 µg/mL gentamycin, 1  
112 µg/mL amphotericin, and collagenase from clostridium histolyticum (Sigma-Aldrich) for one  
113 hour. Following incubation, the lung lymphocytes were washed twice. Lung lymphocytes ( $1$   
114  $\times 10^6$ ) were seeded in a round-bottomed 96-well plate and then incubated in in 500 µL of  
115 DMEM medium containing 10% FCS, 100 U/mL penicillin, 100 µg/mL streptomycin, 1 mM

116 sodium pyruvate, 50  $\mu$ M 2-mercaptoethanol, 50  $\mu$ g/mL gentamycin, and 1  $\mu$ g/mL  
117 amphotericin for four days. The supernatant fluids obtained by lung homogenates were then  
118 collected for the IL-17A, IFN- $\gamma$ , and IL-5 ELISAs.

119

#### 120 *Histological examination*

121 The histological examination was performed as previously reported<sup>36</sup>. The right  
122 lungs were resected, fixed with 10% neutralized buffered formalin (Wako), and embedded in  
123 paraffin. Three-micrometer-thick sections were stained with hematoxylin and eosin. The  
124 numbers of polymorphonuclear leukocytes (other than eosinophils) per 2500  $\mu$ m<sup>2</sup> were  
125 counted.

126

#### 127 *The mouse model of imiquimod (IMQ)-induced psoriasis*

128 Psoriasis was induced in the mouse model as previously described<sup>39</sup>. Briefly,  
129 C57BL/6 mice were treated with either IMQ cream containing 5% IMQ (Mochida  
130 Pharmaceutical) or sham cream, which was applied on the ears for 5 consecutive days. On  
131 day 9, the ear thickness ( $\mu$ m) was measured. In the treatment groups, a cream containing 5%  
132 A2aR antagonist (Istradefylline), liquid containing 10 mM CD39 inhibitor (ARL67156), or  
133 liquid containing 10 mM CD73 inhibitor (AMP-CP) was used. The histological examination  
134 was performed as previously reported<sup>36</sup>. On day 9, the ears were resected, fixed with 10%  
135 buffered and neutralized formalin (Wako), and embedded in paraffin. Three-micrometer-thick  
136 sections were stained with hematoxylin and eosin.

137

#### 138 *Cytokine ELISAs*

139 The concentrations of IFN- $\gamma$ , IL-5, and IL-17A in cell supernatants were measured  
140 using specific ELISA kits (DuoSet Kit, R&D). Any value below the lower limit of detection

141 (15.6 pg/mL) was set to 0. No cytokine cross-reactivity was observed within the detection  
142 ranges of the kits. If necessary, samples were diluted appropriately so that the measurements  
143 fell within the appropriate detection range for each cytokine.

144

#### 145 *Statistical analysis*

146 Differences between two groups were analyzed using an unpaired Student's *t*-test.  
147 Differences between three or more groups were analyzed using a one-way ANOVA with  
148 Tukey's post-hoc test. Clinical scores were analyzed using a non-parametric Mann-Whitney  
149 U-test. All calculations were performed using KaleidaGraph software program (Synergy  
150 software, Reading, PA, USA). P values of <0.05 were considered to indicate statistical  
151 significance.

152

## 153 **Results**

### 154 *An adenosine A2a receptor antagonist, istradefylline, suppresses OVA-induced neutrophilic* 155 *airway inflammation in DO11.10 mice*

156 First, we tested the effect of an adenosine A2a receptor antagonist, istradefylline,  
157 on OVA-induced neutrophilic airway inflammation in OVA TCR-transgenic DO11.10 mice.  
158 DO11.10 mice were challenged with nebulized OVA or with PBS as a control. The  
159 administration of istradefylline was performed starting from 10 days before nebulization  
160 (Fig.1a). Our previous study showed a clear correlation between IL-17A in the lung and  
161 neutrophilic airway inflammation<sup>36</sup>. Indeed, the concentration of IL-17A increased in the  
162 lungs of OVA-challenged DO11.10 mice, which were suppressed by istradefylline on day 4  
163 (Fig.1b). Time course studies showed that the production of IL-17A was time-dependent  
164 (Fig.1c). We observed that istradefylline treatment suppressed IL-17A (a Th17-related  
165 cytokine) and IFN- $\gamma$  (a Th1-related cytokine) secretion on day 4 and had no significant effect



166 on IL-5 (a Th2-related cytokine) secretion (Fig.1d).

167

168 *Istradefylline suppresses OVA-induced neutrophil infiltration in DO11.10 mice*

169 The histology of OVA-challenged DO11.10 mice showed prominent neutrophil  
170 infiltration into the peribronchial area (Fig. 2a), while the infiltration declined in mice that  
171 received istradefylline (Fig. 2b, 2c;  $p=0.021$ ). Accordingly, istradefylline-treatment  
172 suppressed neutrophilic airway inflammation.

173

174 *ARL67156 and AMP-CP also suppress OVA-induced neutrophilic airway inflammation in*  
175 *DO11.10 mice*

176 Since we found that istradefylline suppressed the production of IL-17A in the lung,  
177 we next examined the effect of a CD39 inhibitor (ARL67156) and a CD73 inhibitor  
178 (AMP-CP) on OVA-induced neutrophilic airway inflammation. ARL67156 and AMP-CP  
179 inhibit the production of adenosine (data not shown). DO11.10 mice were challenged with  
180 nebulized OVA, and the administration of ARL67156 and AMP-CP was performed from 10  
181 days before OVA nebulization. As in the case of istradefylline treatment, ARL67156 and  
182 AMP-CP treatment suppressed the production of IL-17A in the lung (Fig.3). This suggests  
183 that adenosine promotes neutrophilic airway inflammation by hypersecretion of IL-17A.

184

185 *Istradefylline, ARL67156, and AMP-CP suppress imiquimod (IMQ)-induced psoriasis in mice*

186 Psoriasis is a Th17-mediated disease<sup>26,27</sup>. Indeed, the skin infiltration of neutrophils,  
187 activated monocytes, Th17 cells are observed in psoriasis and a mouse model of  
188 IMQ-induced psoriasis<sup>40-42</sup>. Mice were treated with either 5% IMQ cream or sham cream.  
189 **Neutrophilic inflammation and hyperkeratosis of the skin were induced by IMQ (Fig. 4a, b,**  
190 **c).** In the treatment groups, 5% istradefylline-containing cream, 10 mM ARL67156 or 10 mM

191 AMP-CP-containing liquid was used. Istradefylline, ARL67156, and AMP-CP significantly  
192 suppressed the effect of IMQ (Fig. 4d). All these observations collectively suggest that the  
193 oral or transdermal administration of istradefylline, ARL67156, and AMP-CP suppresses  
194 Th17-mediated disease.

195

## 196 **Discussion**

197 Atopic asthma is usually triggered by allergens or by antigen-non-specific stimuli,  
198 in which Th2 inflammation, group 2 innate lymphoid cell (ILC2) activation and eosinophilic  
199 inflammation play a pivotal role. Approximately 50% of elderly and 90% of young  
200 individuals with asthma show the atopic phenotype. On the other hand, the recruitment and  
201 activation of neutrophils in airways are associated with resistance to corticosteroids.  
202 Approximately 40% of elderly patients with asthma have neutrophilic airway  
203 inflammation<sup>24,25,43,44</sup>, accompanying increased bronchial IL-17<sup>+</sup> cells<sup>45-47</sup>. The  
204 TCR-transgenic DO11.10 mice have TCR, which specifically recognizes MHC class II-OVA  
205 peptide complex. OVA nebulization alone could induce IL-17-dependent neutrophilic airway  
206 inflammation<sup>28,36,48-50</sup>. This response is OVA-specific, as other antigens could not induce  
207 neutrophilic airway inflammation. In addition, deletion of the IL-17 gene suppressed the  
208 neutrophilic airway inflammation<sup>50</sup>. Thus, this animal model is similar to the pathogenesis of  
209 antigen-induced Th17-mediated neutrophilic airway inflammation<sup>36</sup>. Our studies demonstrate  
210 that istradefylline-treatment suppressed IL-17-dependent neutrophilic airway inflammation in  
211 DO11.10 mice. Similarly, ARL67156 and AMP-CP, which inhibit the production of  
212 adenosine, suppressed IL-17-dependent neutrophilic airway inflammation, which  
213 corroborates our previous findings<sup>38</sup>. Furthermore, the modulation of signaling via A2aR  
214 might ameliorate autoimmune diseases, including allergy and infections. The latter may  
215 include disseminated intravascular coagulation (DIC) or acute respiratory distress syndrome

216 (ARDS) in SARS-CoV-2 disease (COVID-19), which is reportedly associated with  
217 neutrophil extracellular traps (NETs)<sup>51-54</sup>. In recent previous studies, patients with severe  
218 COVID-19 showed the aberrant activation of neutrophils and Th17 promotion<sup>55</sup>, and IL-17  
219 can serve as a biomarker of the severity of COVID-19<sup>56</sup>. Indeed, autopsy samples from the  
220 lungs of COVID-19 patients showed neutrophil infiltration in pulmonary capillaries<sup>57</sup>, and  
221 the peripheral blood of patients showed an increased frequency of Th17 cells<sup>58</sup>. Accordingly,  
222 it is conceivable that istradefylline-treatment may suppress IL-17 secretion and neutrophilic  
223 airway inflammation in COVID-19.

224 Psoriasis had long been characterized as a Th1-mediated disease because psoriatic  
225 lesions showed the elevated mRNA expression of Th1 cytokines (IFN- $\gamma$  and TNF- $\alpha$ )<sup>59</sup>.  
226 Recent studies have shown that the pathology of psoriasis is strongly dependent on IL-17A<sup>60</sup>.  
227 In an IMQ-induced mouse model, activated Th17 cells and marked skin infiltration of  
228 neutrophils are observed<sup>40,42</sup>. Our studies demonstrate that istradefylline, ARL67156, and  
229 AMP-CP suppress IMQ-induced murine psoriasis. It is therefore conceivable that adenosine  
230 promotes IL-17A production in an IMQ -induced mouse model. We also confirmed that  $\gamma\delta$ T  
231 cells secreted IL-17A after stimulation with agonistic anti-CD3/CD28 antibodies in the  
232 presence of adenosine (data not shown). In the dermis with psoriasis, IL-23 from  
233 keratinocytes, activated Langerhans cells, macrophages, and dendritic cells are capable of  
234 promoting the production of IL-17A by  $\gamma\delta$ T cells<sup>61-63</sup>. Adenosine-mediated IL-17A  
235 production may play an important role in psoriasis.

236 Our study demonstrated that istradefylline as well as ARL67156 and AMP-CP suppress  
237 neutrophilic airway inflammation and psoriasis in mice, which strongly attests to the *in vivo*  
238 relevance of adenosine-mediated IL-17A production. It is also suggested that istradefylline as  
239 well as ARL67156 and AMP-CP may be effective treatments for Th17-mediated diseases,  
240 such as psoriasis, neutrophilic bronchial asthma, and autoimmune diseases, due to their

241 suppression of the hypersecretion of IL-17A from Th17 cells. Furthermore, we reported that  
242 adenosine is produced by activated CD4<sup>+</sup> T cells and primes hypersecretion of IL-17A by  
243 CD4<sup>+</sup> T cells via A2aR<sup>38</sup>). These results suggest that CD39 and CD73 expressed on the  
244 CD4<sup>+</sup> T cell surface converts ATP to adenosine, and adenosine binds to A2aR and primes  
245 hypersecretion of IL-17A (Fig. 5). Some researchers argue that an A2aR agonist, CGS21680,  
246 suppresses Th17 differentiation<sup>64-66</sup>). Because CGS21680 is much less selective than the  
247 A2aR agonist we used in a recent previous study (PSB0777)<sup>38</sup>), it is highly conceivable that  
248 these studies gave contradictory results. In addition, some researchers argue that methotrexate  
249 exerts an anti-rheumatic effect by promoting adenosine release<sup>6</sup>). Indeed, different expression  
250 patterns of dopamine receptor subtypes are observed on different populations of immune cells,  
251 depending on the activation status of cells<sup>67</sup>). Because A1R agonism and A2aR antagonism  
252 are biologically equivalent in the presence of adenosine, it is conceivable that adenosine  
253 exhibits anti-rheumatic effects, provided A1R is dominantly expressed by T cells in the local  
254 environment of the rheumatic synovium. The expression patterns of adenosine receptor  
255 subtypes in our current animal models are under investigation.

256 It is suggested that the concentrations of adenosine are increased as much as 50  
257 times by physiological stimuli such as hypoxia, hypoglycemia, and ischemia<sup>68</sup>). A previous  
258 study also suggested that extracellular adenosine is transported into the cell by transporters or  
259 that it is rapidly broken down by adenosine deaminase or adenosine kinase<sup>69</sup>). It is probable  
260 that adenosine induces neutrophilic inflammation in acute stages, *i.e.*, in the innate  
261 immunity-acquired immunity interface.

262

### 263 **Disclosure of ethical statements**

264 No human participant was involved in this study.

265

266 **Conflict of Interest**

267 Sho Matsushita is an employee of iMmno, Inc.

268 The other authors declare no conflicts of interest in association with the present study.

269

270 **Acknowledgments**

271 This work was supported by a Grant-in-Aid for Scientific Research (C) (no. 19K07201),  
272 awarded to M.K., a Grant-in-Aid for Young Scientists (B) (no. 18K15327) to R.T., and a  
273 Grant-in-Aid for Scientific Research (C) (no. 19K08887) awarded to S.M. by the Japanese  
274 Society for the Promotion of Science. This work was also supported by the 44th and 45th  
275 Science Research Promotion Fund, awarded to M.K. by the Promotion and Mutual Aid  
276 Corporation for Private Schools of Japan.

277

278 **Abbreviations**

279 Th, T-helper; CD, cluster of differentiation; TGF, tumor growth factor; IL, interleukin; APCs,  
280 antigen presenting cells; MHC, major histocompatibility complex; TCR, T cell receptor; EAE,  
281 experimental autoimmune encephalomyelitis; CFA, complete Freund's adjuvant; OVA,  
282 ovalbumin; IMQ, imiquimod; n, number of repeat experiments; SD, standard deviation.

283

284 **Author contributions**

285 M.T., R.T., M.K., and S.M., performed the experiments. M.T., M.K., and S.M., conceived and  
286 designed the experiments. M.T., M.K., and S.M., wrote the manuscript. All authors discussed  
287 the results and commented on the manuscript.

288

289 **References**

290

- 291 1) Kaczmarek, E., K. Koziak, J. Sevigny, J. B. Siegel, J. Anrather, A. R. Beaudoin, et al.  
292 Identification and characterization of CD39/vascular ATP diphosphohydrolase. *J Biol*  
293 *Chem.* 1996; 271: 33116-33122.
- 294 2) Jalkanen, S., and M. Salmi. VAP-1 and CD73, endothelial cell surface enzymes in  
295 leukocyte extravasation. *Arteriosclerosis, thrombosis, and vascular biology.* 2008; 28:  
296 18-26.
- 297 3) Junger, W. G. Immune cell regulation by autocrine purinergic signalling. *Nat Rev*  
298 *Immunol.* 2011; 11: 201-212.
- 299 4) Whiteside, T. L., M. Mandapathil, and P. Schuler. The role of the adenosinergic pathway  
300 in immunosuppression mediated by human regulatory T cells (Treg). *Curr Med Chem.*  
301 2011; 18: 5217-5223.
- 302 5) Allard, B., M. S. Longhi, S. C. Robson, and J. Stagg. The ectonucleotidases CD39 and  
303 CD73: Novel checkpoint inhibitor targets. *Immunol Rev.* 2017; 276: 121-144.
- 304 6) Cronstein, B. N., and M. Sitkovsky. Adenosine and adenosine receptors in the  
305 pathogenesis and treatment of rheumatic diseases. *Nat Rev Rheumatol.* 2017; 13:41-51.
- 306 7) Ciruela, F., C. Albergaria, A. Soriano, L. Cuffí, L. Carbonell, S. Sánchez, et al. Adenosine  
307 receptors interacting proteins (ARIPs): Behind the biology of adenosine signaling.  
308 *Biochim Biophys Acta.* 2010; 1798:9-20.
- 309 8) Fredholm, B.B., G. Arslan, L. Halldner, B. Kull, G. Schulte, and W. Wasserman. Structure  
310 and function of adenosine receptors and their genes. *Naunyn-Schmiedeberg's Arch.*  
311 *Pharmacol.* 2000; 362, 364-374.
- 312 9) Livingston, M., L.G. Heaney, and M. Ennis. Adenosine, inflammation and asthma--a  
313 review. *Inflamm Res.* 2004; 53:171-178.
- 314 10) Mori, A., and T. Shindou. Modulation of GABAergic transmission in the striatopallidal  
315 system by adenosine A2A receptors: a potential mechanism for the antiparkinsonian

- 316 effects of A2A antagonists. 2003. *Neurology*. 2003; 61 (11 Suppl 6): S44-48.
- 317 11) Takahashi, M., M. Fujita, N. Asai, M. Saki, and A. Mori. Safety and effectiveness of  
318 istradefylline in patients with Parkinson's disease: interim analysis of a post-marketing  
319 surveillance study in Japan. *Expert Opin Pharmacother*. 2018; 19:1635-1642.
- 320 12) Wilson, J. M., C. C. Kurtz, S. G. Black, W. G. Ross, M. S. Alam, J. Linden, et al. The  
321 A2B adenosine receptor promotes Th17 differentiation via stimulation of dendritic cell  
322 IL-6. *J Immunol*. 2011; 186: 6746-6752.
- 323 13) Matsuzaki, G., and M. Umemura. Interleukin-17 as an effector molecule of innate and  
324 acquired immunity against infections. *Microbiol Immunol*. 2007; 51: 1139-1147.
- 325 14) Manel, N., D. Unutmaz, and D. R. Littman. The differentiation of human T(H)-17 cells  
326 requires transforming growth factor-beta and induction of the nuclear receptor  
327 RORgamma. *Nat Immunol*. 2008; 9: 641-649.
- 328 15) Ivanov, I. I., L. Zhou, and D. R. Littman. Transcriptional regulation of Th17 cell  
329 differentiation. *Semin Immunol*. 2007, 19: 409-417.
- 330 16) Aggarwal, S., and A.L. Gurney. IL-17: prototype member of an emerging cytokine family.  
331 *J Leukoc Biol*. 2002; 71:1-8.
- 332 17) Kolls J.K., and A. Linden. Interleukin-17 family members and inflammation. *Immunity*.  
333 2004; 21: 467-476.
- 334 18) Ouyang, W., J.K. Kolls, and Y Zheng. The biological functions of T helper 17 cell  
335 effector cytokines in inflammation. *Immunity*. 2008; 28:454-467.
- 336 19) Tesmer, L. A., S. K. Lundy, S. Sarkar, and D. A. Fox. Th17 cells in human disease.  
337 *Immunol Rev*. 2008; 223: 87-113.
- 338 20) Ogura, H., M. Murakami, Y. Okuyama, M. Tsuruoka, C. Kitabayashi, M. Kanamoto, et al.  
339 Interleukin-17 promotes autoimmunity by triggering a positive-feedback loop via  
340 interleukin-6 induction. *Immunity*. 2008; 29, 628-636.

- 341 21) Leng, R.X., G.M. Chen, H.F. Pan, and D.Q. Ye. The role of IL-23/IL-17 axis in the  
342 etiopathogenesis of Behçet's disease. *Clin Rheumatol.* 2010; 29, 1209.
- 343 22) Arayssi, T., and A. Hamdan. New insights into the pathogenesis and therapy of Behçet's  
344 disease. *Curr Opin Pharmacol.* 2004; 4:183-188.
- 345 23) Hirota, K., M. Hashimoto, H. Yoshitomi, S. Tanaka, T. Nomura, T. Yamaguchi, et al. T  
346 cell self-reactivity forms a cytokine milieu for spontaneous development of IL-17+ Th  
347 cells that cause autoimmune arthritis. *J Exp Med.* 2007; 204, 41-47.
- 348 24) McKinley L., J. F. Alcorn, A. Peterson, R. B. Dupont, S. Kapadia, A. Logar, et al. TH17  
349 cells mediate steroid-resistant airway inflammation and airway hyperresponsiveness in  
350 mice. *J. Immunol.* 2008; 181: 4089-4097.
- 351 25) Lindén A. Role of interleukin-17 and the neutrophil in asthma. *Int. Arch. Allergy Immunol.*  
352 2001; 126: 179-184.
- 353 26) Rizzo, H.L., S. Kagami, K.G. Phillips, S.E. Kurtz, S.L. Jacques, and A. Blauvelt.  
354 IL-23-mediated psoriasis-like epidermal hyperplasia is dependent on IL-17A. *J Immunol.*  
355 2011; 186, 1495-1502.
- 356 27) Cai, Y., X. Shen, C. Ding, C. Qi, K. Li, X. Li, et al. Yan. 2011. Pivotal role of dermal  
357 IL-17-producing gammadelta T cells in skin inflammation. *Immunity* 35, 596-610.
- 358 28) Nakae, S. Y. Komiyama, A. Nambu, K. Sudo, M. Iwase, I. Homma, K. Sekikawa, M.  
359 Asano, and Y. Iwakura. Antigen-specific T cell sensitization is impaired in IL-17-deficient  
360 mice, causing suppression of allergic cellular and humoral responses. *Immunity.* 2002; 17,  
361 375-387.
- 362 29) Komiyama, Y. S. Nakae, T. Matsuki, A. Nambu, H. Ishigame, S. Kakuta, et al. IL-17  
363 plays an important role in the development of experimental autoimmune  
364 encephalomyelitis. *J Immunol.* 2006; 177: 566-73.
- 365 30) Matusevicius, D., P Kivisäkk, B He, N Kostulas, V Ozenci, S Fredrikson, and H Link.



- 366 Interleukin-17 mRNA expression in blood and CSF mononuclear cells is augmented in  
367 multiple sclerosis. *Mult Scler.* 1999; 5: 101-4.
- 368 31) Jadidi-Niaragh, F., and A Mirshafiey. Th17 cell, the new player of neuroinflammatory  
369 process in multiple sclerosis. *Scand J Immunol.* 2011; 74: 1-13.
- 370 32) Lock, C., G. Hermans, R. Pedotti, A. Brendolan, E. Schadt, H. Garren, et al.  
371 Gene-microarray analysis of multiple sclerosis lesions yields new targets validated in  
372 autoimmune encephalomyelitis. *Nat Med.* 2002; 8: 500-508.
- 373 33) Vaknin-Dembinsky, A., K. Balashov, and H. L. Weiner. IL-23 is increased in dendritic  
374 cells in multiple sclerosis and downregulation of IL-23 by antisense oligos increases  
375 dendritic cell IL-10 production. *J. Immunol.* 2006; 176: 7768-7774.
- 376 34) Pierson, E. R., C. A. Wagner, and J. M. Goverman. The contribution of neutrophils to  
377 CNS autoimmunity. *Clin Immunol.* 2018; 189: 23-28.
- 378 35) Nakano, K., K. Yamaoka, K. Hanami, K. Saito, Y. Sasaguri, N. Yanagihara, S. et al.  
379 Dopamine induces IL-6-dependent IL-17 production via D1-like receptor on CD4 naive  
380 T Cells and D1-like receptor antagonist SCH-23390 inhibits cartilage destruction in a  
381 human rheumatoid arthritis/SCID mouse chimera model. *J. Immunol* 186: 3745-3752.
- 382 36) Nakagome, K., M. Imamura, H. Okada, K. Kawahata, T. Inoue, K. Hashimoto, H. et al.  
383 2011. Dopamine D1-like receptor antagonist attenuates Th17-mediated immune response  
384 and OVA-Ag-induced neutrophilic airway inflammation. *J. Immunol.* 2011; 186:  
385 5975-5982.
- 386 37) Arreola, R., Alvarez-Herrera, S., Perez-Sanchez, G., Becerril-Villanueva, E.,  
387 Cruz-Fuentes, C., Flores-Gutierrez, E.O., et al. Immunomodulatory Effects Mediated by  
388 Dopamine. *J. Immunol. Res.* 2016; 3160486.
- 389 38) Tokano, M., S. Matsushita, R. Takagi, T. Yamamoto, and M. Kawano. Extracellular  
390 adenosine induces hypersecretion of IL-17A by T-helper 17 cells through the adenosine

- 391 A2a receptor to promote neutrophilic inflammation. *bioRxiv*. 2021; 441713; doi:  
392 <https://doi.org/10.1101/2021.04.29.441713>
- 393 39) Takagi, R., M. Kawano, T. Sato, and S. Matsushita. Tannic acid, a dopamine receptor  
394 agonist, ameliorates periodontitis, atopic dermatitis and psoriasis in animal models.  
395 *Current Trends Immunol*. 2021; 22:11-17.
- 396 40) Malki, K. E., S.H. Karbach, J. Huppert, M. Zayoud, S. Reissig, R. Schüler, A. et al. An  
397 alternative pathway of imiquimod-induced psoriasis-like skin inflammation in the  
398 absence of interleukin-17 receptor a signaling. *J Invest Dermatol*. 2013; 133:441-451.
- 399 41) Fits, L F., S. Mourits, J. S. A. Voerman, M. Kant, L. Boon, J. D. Laman, et al.  
400 Imiquimod-induced psoriasis-like skin inflammation in mice is mediated via the  
401 IL-23/IL-17 axis. *J Immunol*. 2009; 182:5836-5845.
- 402 42) Moos, S., A. N. Mohebiany, A. Waisman, and F. C. Kurschus. Imiquimod-induced  
403 psoriasis in mice depends on the IL-17 signaling of keratinocytes. *J Invest Dermatol*.  
404 2019; 139:1110-1117.
- 405 43) Douwes, J., P. Gibson, J. Pekkanen, and N. Pearce. Non-eosinophilic asthma: importance  
406 and possible mechanisms. *Thorax*. 2002; 57: 643-648.
- 407 44) Holgate, S. T., and R. Polosa. The mechanisms, diagnosis, and management of severe  
408 asthma in adults. *Lancet*. 2006; 368: 780-793.
- 409 45) Barczyk, A., W Pierzchala, and E Sozańska. Interleukin-17 in sputum correlates with  
410 airway hyperresponsiveness to methacholine. *Respir. Med*. 2003; 97: 726-733.
- 411 46) Al-Ramli W., D. Préfontaine, F. Chouiali, J. G. Martin, R. Olivenstein, C. Lemièrre, et al.  
412 T(H)17-associated cytokines (IL-17A and IL-17F) in severe asthma. *J. Allergy Clin*.  
413 *Immunol*. 2009; 123: 1185-1187.
- 414 47) Bullone, M., V. Carriero, F. Bertolini, A. Folino, A. Mannelli, A. D. Stefano, et al.  
415 Elevated serum IgE, oral corticosteroid dependence and IL-17/22 expression in highly

- 416 neutrophilic asthma. *Eur Respir J.* 2019; 54: 1900068.
- 417 48) Knott, P. G., P R Gater, and C P Bertrand. Airway inflammation driven by  
418 antigen-specific resident lung CD4(+) T cells in alphabeta-T cell receptor transgenic mice.  
419 *Am J Respir Crit Care Med.* 2000; 161: 1340-1348
- 420 49) Wilder, J. A., D. D. Collie, D. E. Bice, Y. Tesfaigzi, C. R. Lyons, and M. F. Lipscomb.  
421 Ovalbumin aerosols induce airway hyperreactivity in naïve DO11.10 T cell receptor  
422 transgenic mice without pulmonary eosinophilia or OVA-specific antibody. *J Leukoc Biol.*  
423 2001; 69: 538-47.
- 424 50) Nakae, S., H. Suto, G. J. Berry, S.J. Galli. Mast cell-derived TNF can promote Th17  
425 cell-dependent neutrophil recruitment in ovalbumin-challenged OTII mice. *Blood.* 2007;  
426 109: 3640-8.
- 427 51) Middleton, E. A., X. He, F. Denorme, R. A. Campbell, D. Ng, S. P. Salvatore, M.  
428 Mostyka, A. Baxter-Stoltzfus, et al. Neutrophil extracellular traps contribute to  
429 immunothrombosis in COVID-19 acute respiratory distress syndrome. *Blood.* 2020; 136:  
430 1169-1179
- 431 52) Parackova, Z., I. Zentsova, M. Bloomfield, P. Vrabcova, J. Smetanova, A. Klocperk, et al.  
432 Disharmonic inflammatory signatures in COVID-19: Augmented neutrophils' but  
433 impaired monocytes' and dendritic cells' responsiveness. *Cells.* 2020; 9:2206.
- 434 53) Tomar, B., H. Anders, J. Desai, and S. R. Mulay. Neutrophils and neutrophil extracellular  
435 traps drive necroinflammation in COVID-19. *Cells.* 2020; 9:1383.
- 436 54) Sahebnaasagh, A., F. Saghafi, M. Safdari, M. Khataminia, A. Sadremomtaz, Z. Talaei 6, et  
437 al. Neutrophil elastase inhibitor (sivelestat) may be a promising therapeutic option for  
438 management of acute lung injury/acute respiratory distress syndrome or disseminated  
439 intravascular coagulation in COVID-19. *J Clin Pharm Ther.* 2020; 45:1515-1519.
- 440 55) Parackova, Z., M. Bloomfield, A. Klocperk, and A. Sediva. Neutrophils mediate Th17

- 441 promotion in COVID-19 patients. *J Leukoc Biol.* 2021; 109:73-76.
- 442 56) Pacha, O., M. A. Sallman, and S. E. Evans. COVID-19: a case for inhibiting IL-17? . *Nat*  
443 *Rev Immunol.* 2020; 20:345-346.
- 444 57) Barnes, B. J, J. M. Adrover, A. Baxter-Stoltzfus, Al. Borczuk, J. Cools-Lartigue, J. M.  
445 Crawford, et al. Targeting potential drivers of COVID-19: Neutrophil extracellular traps.  
446 *J Exp Med.* 2020; 217:e20200652.
- 447 58) Xu, Z., L. Shi, Y. Wang, J. Zhang, L. Huang, C. Zhang, et al. Pathological findings of  
448 COVID-19 associated with acute respiratory distress syndrome. *Lancet Respir Med.*  
449 2020; 8:420-422
- 450 59) Uyemura, K., M. Yamamura, D. F. Fivenson, R. L. Modlin, and B. J. Nickoloff. The  
451 cytokine network in lesional and lesion-free psoriatic skin is characterized by a T-helper  
452 type 1 cell-mediated response. *J. Invest. Dermatol.* 1993; 101: 701-705.
- 453 60) Brembilla, N. C., L. Senra, and W. Boehncke. The IL-17 family of cytokines in psoriasis:  
454 IL-17A and beyond. *Front Immunol.* 2018; 9:1682.
- 455 61) Tang, C., S. Chen, H. Qian, W. Huang. Interleukin-23: as a drug target for autoimmune  
456 inflammatory diseases. *Immunology.* 2012; 135:112-124.
- 457 62) Boutet MA, A. Nerviani, G. G. Afflitto, and C. Pitzalis. Role of the IL-23/IL-17 axis in  
458 psoriasis and psoriatic arthritis: The clinical importance of its divergence in skin and  
459 joints. *Int J Mol Sci.* 2018; 19:530.
- 460 63) Lai, Y., D. Li, C. Li, B. Muehleisen, K. A. Radek, H. J. Park, et al. The antimicrobial  
461 protein REG3A regulates keratinocyte proliferation and differentiation after skin injury.  
462 *Immunity.* 2012; 37:74-84.
- 463 64) Alchera, E., S. Rolla, C. Imarisio, V. Bardina, G. Valente, F. Novelli, et al. Adenosine A2a  
464 receptor stimulation blocks development of nonalcoholic steatohepatitis in mice by  
465 multilevel inhibition of signals that cause immunolipototoxicity. *Transl Res.* 2017; 182:

466 75-87.

467 65) Wang, L., H. Wan, W. Tang, Y. Ni, X. Hou, L. Pan, et al. Critical roles of adenosine A2A  
468 receptor in regulating the balance of Treg/Th17 cells in allergic asthma. *Clin Respir J.*  
469 2018; 12: 149-157.

470 66) Ansari, M. A., A. Nadeem, S. M. Attia, S. A. Bakheet, M. Raish, and S. F. Ahmad.  
471 Adenosine A2A receptor modulates neuroimmune function through Th17/retinoid-related  
472 orphan receptor gamma t (RORgammat) signaling in a BTBR T(+) Itpr3(tf)/J mouse  
473 model of autism. *Cell Signal.* 2017; 36: 14-24.

474 67) Talhada, D., M Rabenstein, and K Ruscher. The role of dopaminergic immune cell  
475 signalling in poststroke inflammation. *Ther Adv Neurol Disord.* 2018; 11:  
476 1756286418774225.

477 68) Latini, S., and F Pedata. Adenosine in the central nervous system: release mechanisms and  
478 extracellular concentrations. *J Neurochem.* 2001; 79:463-84

479 69) Engler, R.L. Adenosine. The signal of life?. *Circulation.* 1991; 84: 951-954

480 **Figure legends**

481 Figure 1. An adenosine A2a receptor antagonist, istradefylline, suppresses OVA-induced  
482 neutrophilic airway inflammation in DO11.10 mice. (a) The protocol of the OVA-induced  
483 neutrophilic airway inflammation assay. (b, c) Lung homogenate was assayed for  
484 concentrations of IL-17A by an ELISA. (d) Lung homogenate was assayed for concentrations  
485 of IL-17A (left), IFN- $\gamma$  (center), or IL-5 (right) by an ELISA. **The experiments were repeated**  
486 **7-10 times, and similar results were obtained.** Data are expressed as the mean  $\pm$  SD and were  
487 compared using an unpaired Student's *t*-test. \**p* < 0.05 and \*\**p* < 0.01, in comparison to the  
488 value of water (challenged OVA).

489

490 Figure 2. **Istradefylline suppresses OVA-induced neutrophilic infiltration in DO11.10 mice.**  
491 **The lung sections from mice administered oral water (a) or istradefylline solution (b) were**  
492 **stained with hematoxylin and eosin (Scale bar, 50  $\mu$ m). (c) The numbers of**  
493 **polymorphonuclear leukocytes per 2500  $\mu$ m<sup>2</sup>. The experiments were repeated three times,**  
494 **and similar results were obtained. Data are expressed as the mean  $\pm$  SD and were compared**  
495 **using an unpaired Student's *t*-test. \**p* < 0.05, in comparison to the value of water (challenged**  
496 **OVA).**

497

498 Figure 3. Inhibitor of CD39 (ARL67156) and inhibitor of CD73 (AMP-CP) suppresses  
499 OVA-induced neutrophilic airway inflammation in DO11.10 mice. DO11.10 mice were  
500 treated as described for Fig.1. Lung homogenate was assayed for concentrations of IL-17A by  
501 an ELISA. **The experiments were repeated 7-10 times, and similar results were obtained.**  
502 Data are expressed as the mean  $\pm$  SD and were compared using an unpaired Student's *t*-test.  
503 \**P* < 0.05 and \*\**P* < 0.01 in comparison to the value of water (challenged OVA).

504

505 Figure 4. Istradefylline, ARL67156, and AMP-CP suppress IMQ-induced psoriasis in mice.  
506 Mice were treated either with sham cream (a) or IMQ cream containing 5% IMQ (b, c).  
507 Figure 4c shows a close-up view of Figure 4b. Ear sections from mice were stained with  
508 hematoxylin and eosin (Scale bar, 50  $\mu\text{m}$ ). (d) The ear thickness ( $\mu\text{m}$ ) of was measured on  
509 day 9. Values obtained by subtracting the negative control values ( $\Delta\mu\text{m}$ ) are shown. In  
510 treatment groups, cream containing 5% istradefylline, liquid containing 10 mM ARL67156,  
511 or liquid containing 10 mM AMP-CP inhibitor was used. Data were obtained from three  
512 independent experiments (n = 3-4 mice/group), and similar results were obtained. Data are  
513 expressed as the mean  $\pm$  SD and were compared using an unpaired Student's *t*-test. \*P < 0.05  
514 and \*\*P < 0.01, in comparison to the value of the non-treatment group.

515

516 Figure 5. CD4<sup>+</sup> T cells produce ATP by antigen presentation. Extracellular adenosine is  
517 produced from ATP secreted by CD39 and CD73. Adenosine binds to A2aR expressed on the  
518 cell surface and primes hypersecretion of IL-17A (hypothesis).

Fig. 5

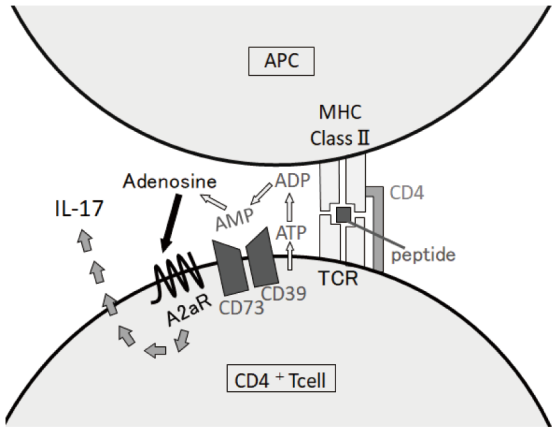



Fig.1

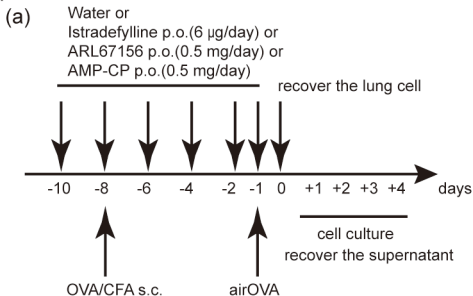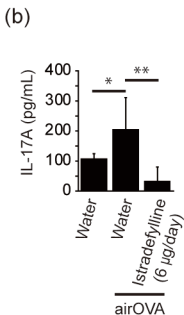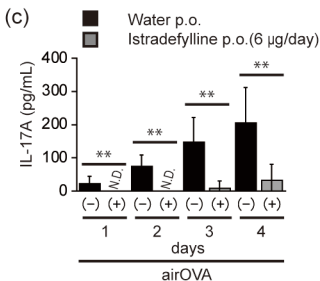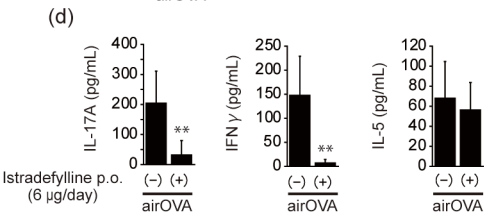

Fig.2

(a)

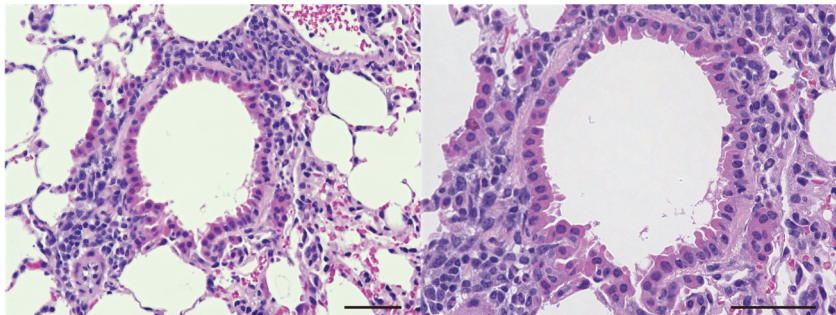

(b)

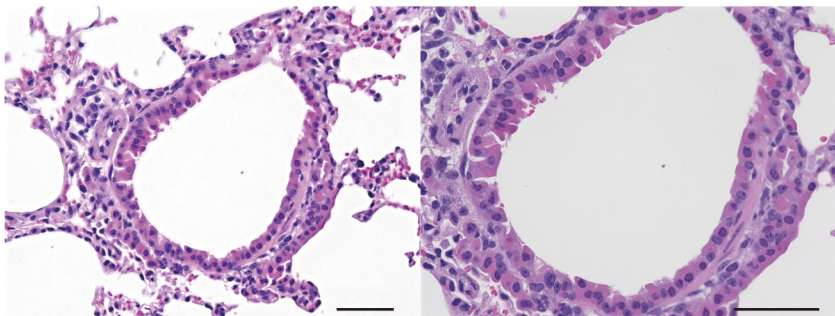

(c)

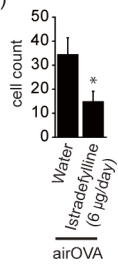

Fig. 3

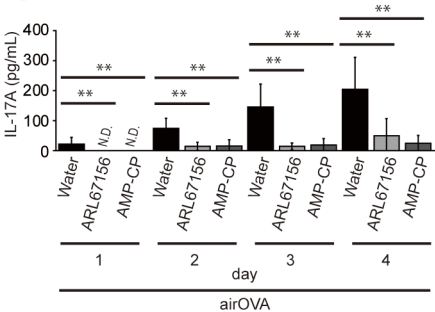

Fig. 4

(a)

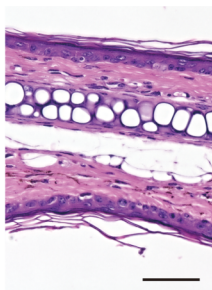

IMQ(-)

(b)

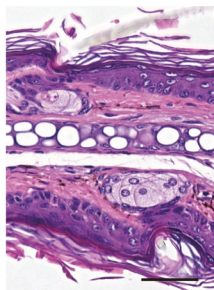

IMQ(+)

(c)

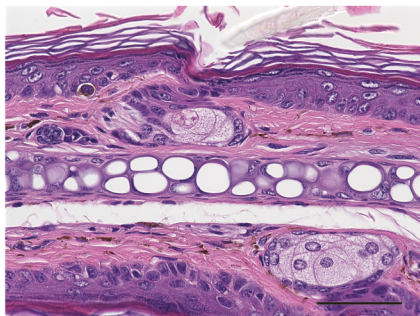

IMQ(+)

(d)

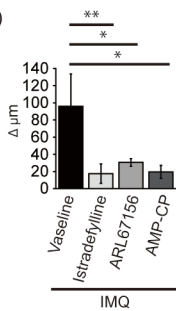

Source: https://www.biorxiv.org/content/10.1101/2021.05.21.445220v2.full.pdf
